# Supplementary material for: NiMoO4nanorod deposited carbon sponges with ant-nest-like interior channels for high-performance pseudocapacitors
Source: Royal Society of Chemistry journal article supplement (doi:10.1039/c8qi00247a), 2018-01-01
Supplement: c8qi00247a1.pdf [file c8qi00247a1.pdf]

## Supporting Information

### **NiMoO<sub>4</sub> Nanorod Deposited Carbon Sponge with Ant-Nest-Like Interior Channels for High-Performance Pseudocapacitors**

Yunpeng Huang<sup>a</sup>, Fen Cui<sup>b</sup>, Yan Zhao<sup>a</sup>, Jiabiao Lian<sup>a</sup>, Jian Bao<sup>a</sup>, Tianxi Liu<sup>c,\*</sup>, Huaming  
Li<sup>a,b,\*</sup>

<sup>a</sup> Institute for Energy Research, Jiangsu University, Zhenjiang, 212013, PR China

<sup>b</sup> School of Chemistry and Chemical Engineering, Jiangsu University, Zhenjiang, 212013, PR  
China

<sup>c</sup> State Key Laboratory for Modification of Chemical Fibers and Polymer Materials, College  
of Materials Science and Engineering, Donghua University, Shanghai 201620, China

\*Corresponding author: [txliu@dhu.edu.cn](mailto:txliu@dhu.edu.cn) [lhm@ujs.edu.cn](mailto:lhm@ujs.edu.cn)

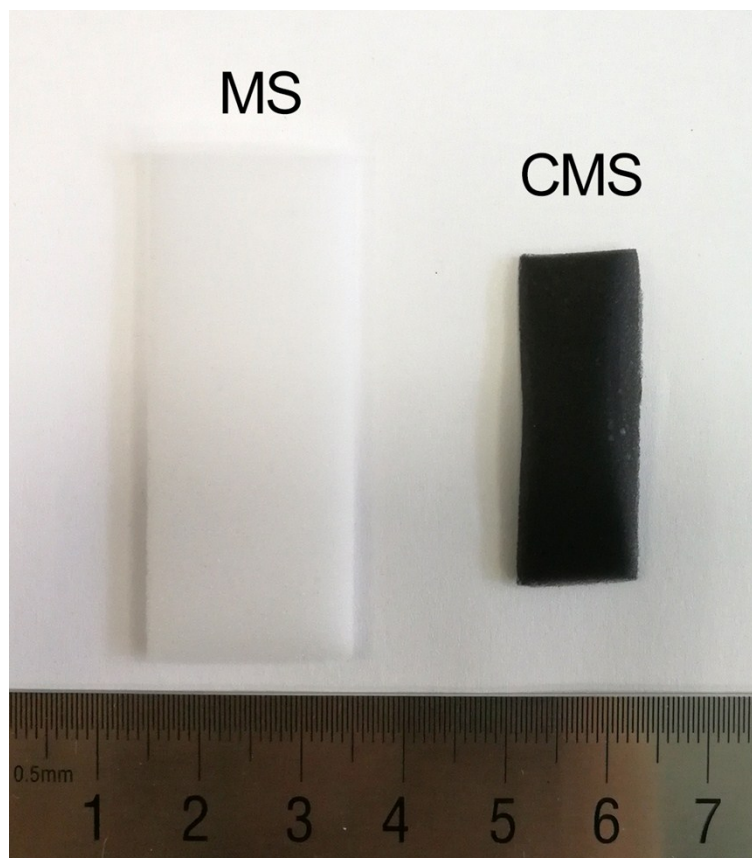

**Fig. S1** Digital photographs of melamine sponge (MS) and carbonized melamine sponge (CMS).

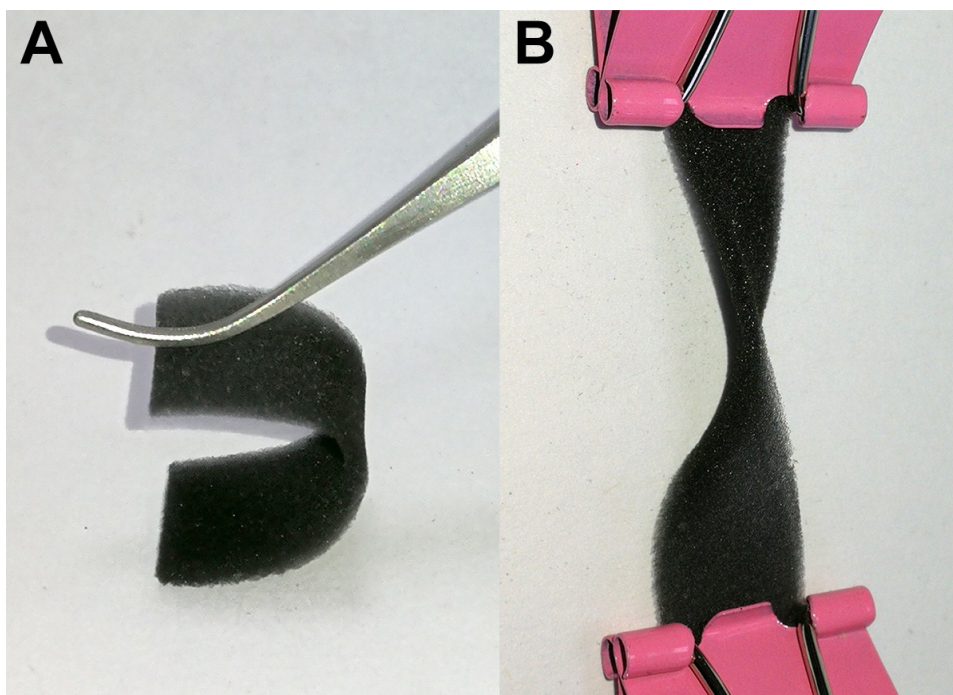

**Fig. S2** Demonstration of the (A) bending and (B) twisting tests on CMS.

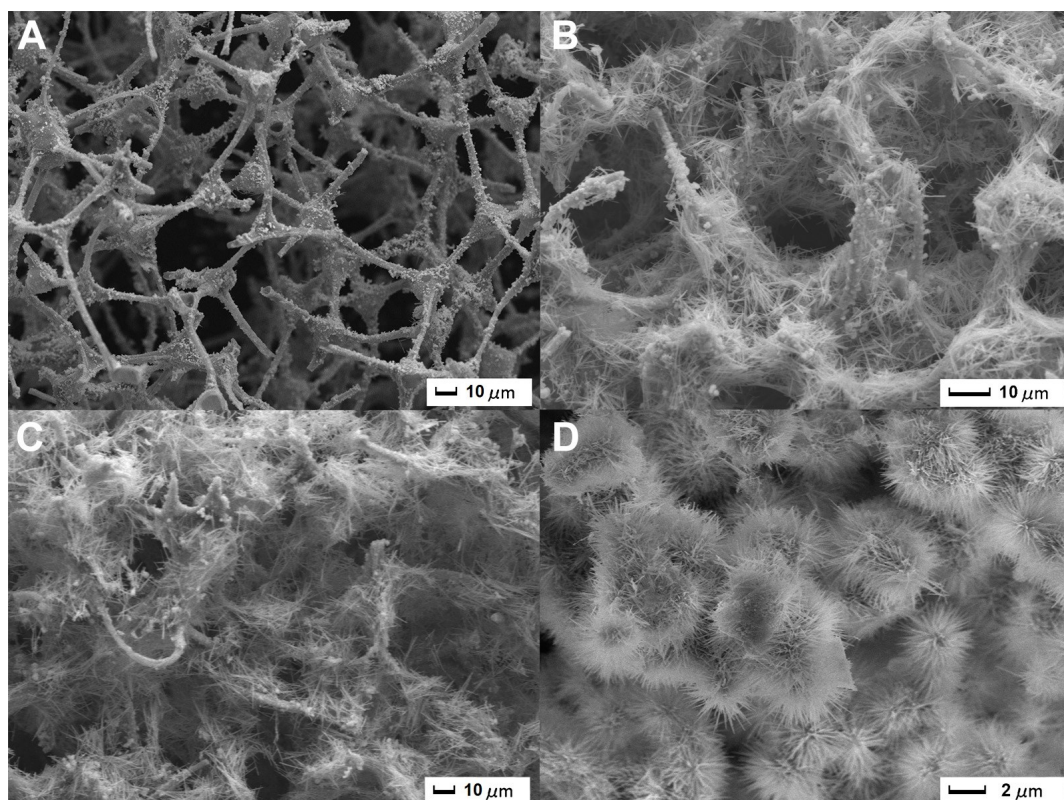

**Fig. S3** SEM images of (A) NiMoO<sub>4</sub>/CMS-10, (B) NiMoO<sub>4</sub>/CMS-30, (C) NiMoO<sub>4</sub>/CMS-40 and (D) pure NiMoO<sub>4</sub>.

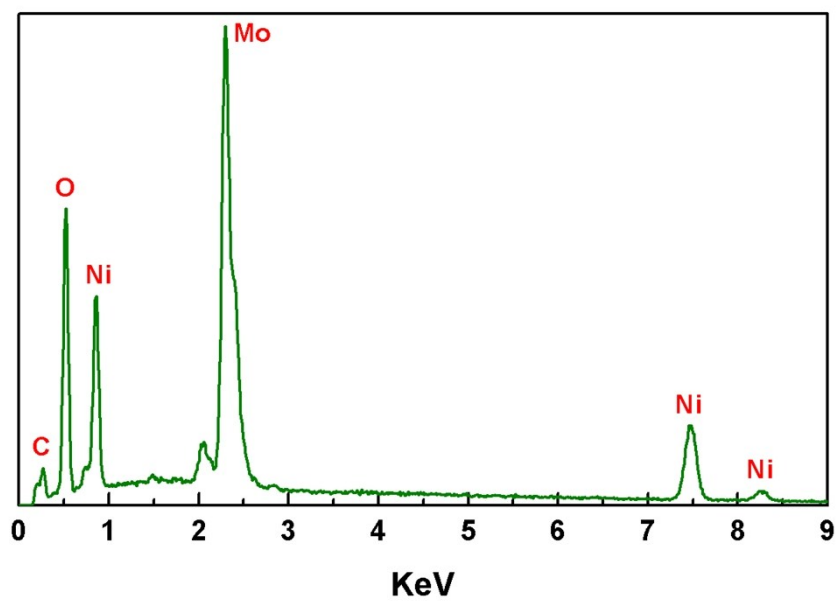

**Fig. S4** Elemental distribution on NiMoO<sub>4</sub>/CMS-20.

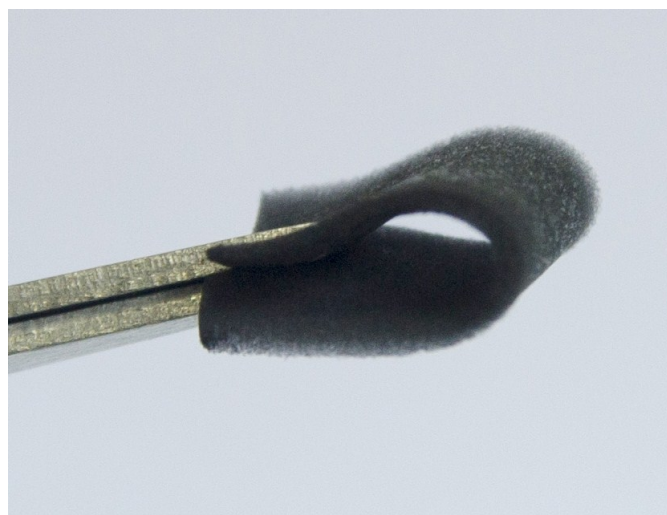

**Fig. S5** Digital photograph of NiMoO<sub>4</sub>/CMS-20 composite sponge under large scale bending deformation.

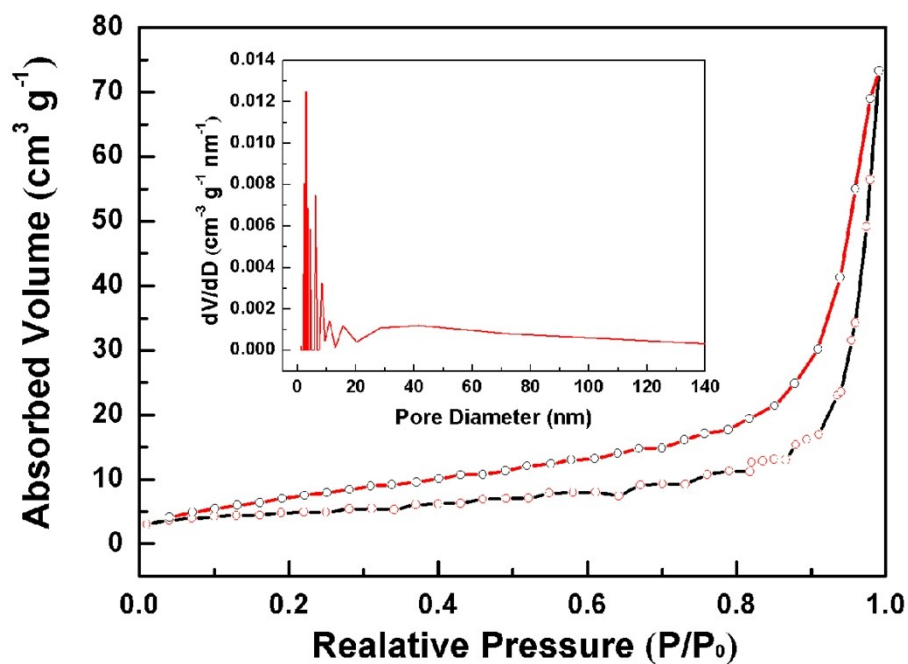

**Fig. S6** Nitrogen adsorption/desorption isotherms and pore size distribution of  $\text{NiMoO}_4/\text{CMS-20}$  composite sponge.

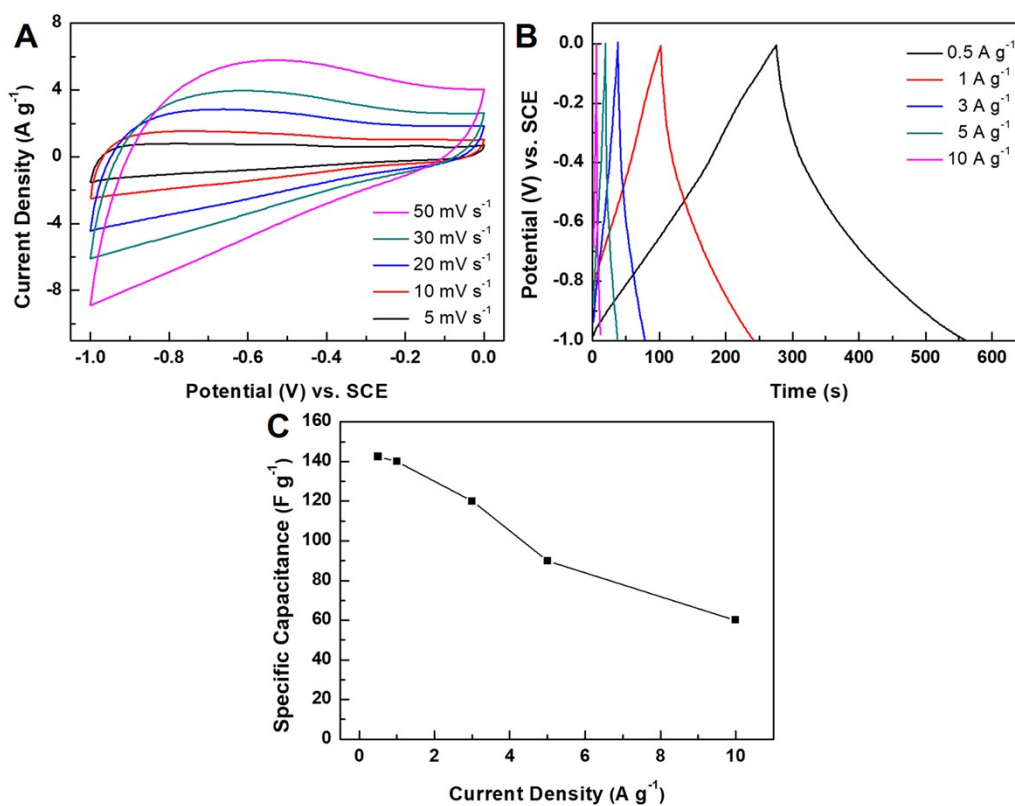

**Fig. S7** (A) CV curves and (B) Galvanostatic charge-discharge curves of the AC electrode; (C) Specific capacitance of AC electrode at different current densities.

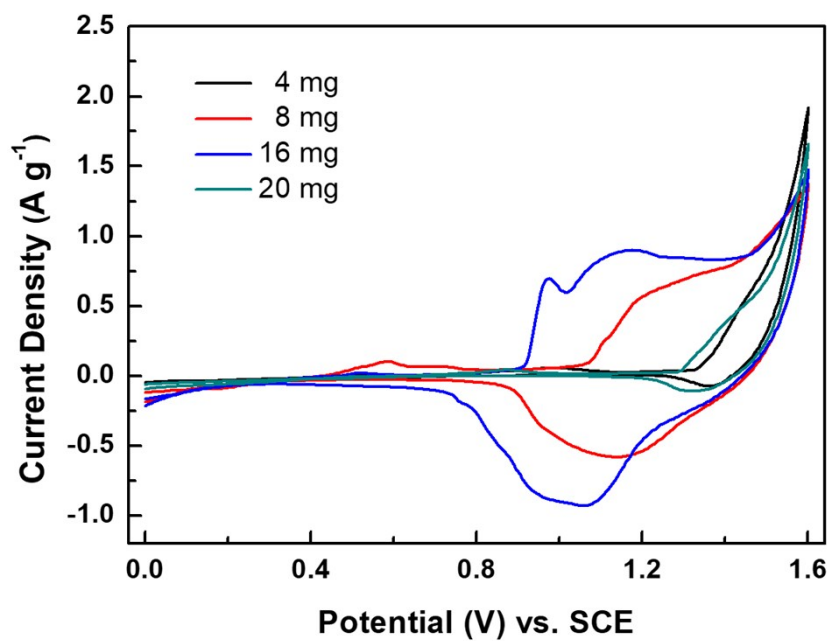

**Fig. S8** CV curves of the asymmetric supercapacitors devices with different AC masses.

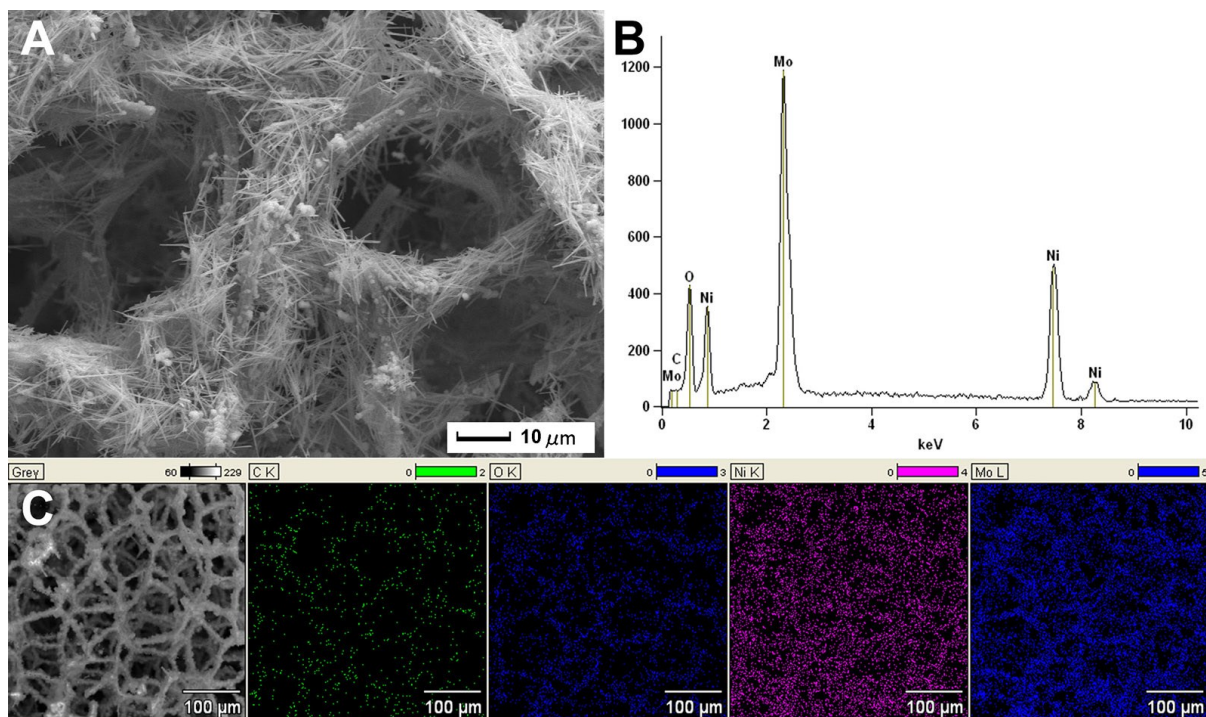

**Fig. S9** (A) SEM image and (B, C) elemental mapping of NiMoO<sub>4</sub>/CMS-20 after electrochemical tests.

**Table S1** Comparison of the electrochemical performance of NiMoO<sub>4</sub>/CMS composite sponge and other NiMoO<sub>4</sub> based electrode materials reported in literatures.

| Electrode materials                                               | Substrates                 | Mass loading of active components | Electrolyte | Current density (A g <sup>-1</sup> ) | Specific capacitance (F g <sup>-1</sup> ) | References |
|-------------------------------------------------------------------|----------------------------|-----------------------------------|-------------|--------------------------------------|-------------------------------------------|------------|
| α-NiMoO <sub>4</sub> Nanorods                                     | -                          | -                                 | 3 M KOH     | -                                    | 730                                       | 1          |
| NiMoO <sub>4</sub> /graphene                                      | Graphene                   | -                                 | 6 M KOH     | 5                                    | 161                                       | 2          |
| MnO <sub>2</sub> @NiMoO <sub>4</sub> core-shell nanostructure     | MnO <sub>2</sub>           | -                                 | 2 M KOH     | -                                    | 1123.7                                    | 3          |
| NiMoO <sub>4</sub> nanosheet                                      | Ni foam                    | 1.2 mg cm <sup>2</sup>            | 2 M KOH     | 1                                    | 1221.2                                    | 4          |
| NiMoO <sub>4</sub> -carbon composite nanofibers                   | Carbon nanofiber           | 50 wt%                            | 6 M KOH     | 1                                    | 1438                                      | 5          |
| CoMoO <sub>4</sub> @NiMoO <sub>4</sub> core-shell heterostructure | Carbon fabric              | 1.8 mg cm <sup>2</sup>            | 2 M KOH     | 1                                    | 1582                                      | 6          |
| NiMoO <sub>4</sub> /CMS composite sponge                          | Carbonized melamine sponge | 4.6 wt%                           | 3 M KOH     | 1                                    | 1689                                      | This work  |

## References:

- [1] P. R. Jothi, K. Shanthi, R. R. Salunkhe, M. Pramanik, V. Malgras, S. M. Alshehri, Y. Yamauchi, *Eur. J. Inorg. Chem.* **2015**, 2015, 3694.
- [2] D. Ghosh, S. Giri, C. K. Das, *Nanoscale* **2013**, 5, 10428.
- [3] X. H. Wang, H. Y. Xia, J. Gao, B. Shi, Y. Fang, M. W. Shao, *J. Mater. Chem. A* **2016**, 4, 18181.
- [4] S. J. Peng, L. L. Li, H. B. Wu, S. Madhavi, X. W. D. Lou, *Adv. Energy Mater.* **2015**, 5, 1401172.
- [5] V. S. Budhiraju, R. Kumar, A. Sharma, S. Sivakumar, *Electrochim. Acta* **2017**, 238, 337.
- [6] J. Wang, L. P. Zhang, X. S. Liu, X. Zhang, Y. L. Tian, X. X. Liu, J. P. Zhao, Y. Li, *Sci. Rep.* **2017**, 7, 41088.
